# Supplementary material for: Curcumin and Ethanol Effects in Trembler-J Schwann Cell Culture
Source: Preprints.org preprint supplement (doi:10.20944/preprints202203.0001.v1), 2022-03-01
Supplement: Supplementary file 1 [file supplementary]

Appendix 1. Supplementary materials

Modulation of PMP22 by curcumin in Trembler-J Schwann cell culture

Lucia Vázquez Alberdi 1,*, Gonzalo Rosso 2,3, Lucia Velóz 4, Carlos Romeo 5, Joaquina Farias 6, María Vittoria Di Tomaso 7, Miguel Calero 8 and Alejandra Kun 1,9,*

1 Laboratorio de Biología Celular del Sistema Nervioso Periférico, Departamento de Proteínas y Ácidos Nucleicos, Instituto de Investigaciones Biológicas Clemente Estable, 11600 Montevideo, Uruguay; [lvazquez@iibce.edu.uy](mailto:lvazquez@iibce.edu.uy) (L.V.A.)

2 Max-Planck-Institute for the Science of Light & Max-Planck-Zentrum für Physik und Medizin, 91058 Erlangen, Germany; [gonzalo.rosso@mpl.mpg.de](mailto:gonzalo.rosso@mpl.mpg.de) (G.R.)

3 Institute of Physiology II, University of Münster, 48149 Münster, Germany

4 Sección Biología Celular, Facultad de Ciencias, Universidad de la República, 11400 Montevideo, Uruguay; [lveloz@fcien.edu.uy](mailto:lveloz@fcien.edu.uy) (L.V.)

5 Departamento de Proteínas y Ácidos Nucleicos, Instituto de Investigaciones Biológicas Clemente Estable, 11600 Montevideo, Uruguay; [carlosj.romeo@gmail.com](mailto:carlosj.romeo@gmail.com) (C.R.)

6 Espacio de Biología Vegetal del Noreste, Centro Universitario de Tacuarembó, CENUR Noreste, Universidad de la República, 45000 Tacuarembó, Uruguay; [joaquina.farias@cut.edu.uy](mailto:joaquina.farias@cut.edu.uy) (J.F.)

7 Departamento de Genética, Instituto de Investigaciones Biológicas Clemente Estable, 11600, Montevideo, Uruguay; [marvi@iibce.edu.uy](mailto:marvi@iibce.edu.uy) (M.V.D.T.)

8 Unidad de Encefalopatías Espongiformes, UFIEC, CIBERNED, CIEN Foundation, Queen Sofia Foundation Alzheimer Center, Instituto de Salud Carlos III, 28031 Madrid, Spain; [mcalero@isciii.es](mailto:mcalero@isciii.es) (M.C.)

9 Sección Bioquímica, Facultad de Ciencias, Universidad de la República, 11400 Montevideo, Uruguay

***** Correspondence: [lvazquez@iibce.edu.uy](mailto:lvazquez@iibce.edu.uy) (L.V.A.) [akun@fcien.edu.uy](mailto:akun@fcien.edu.uy) (A.K.); Tel.: +598-2487-1616; Fax: +598-2487-5461


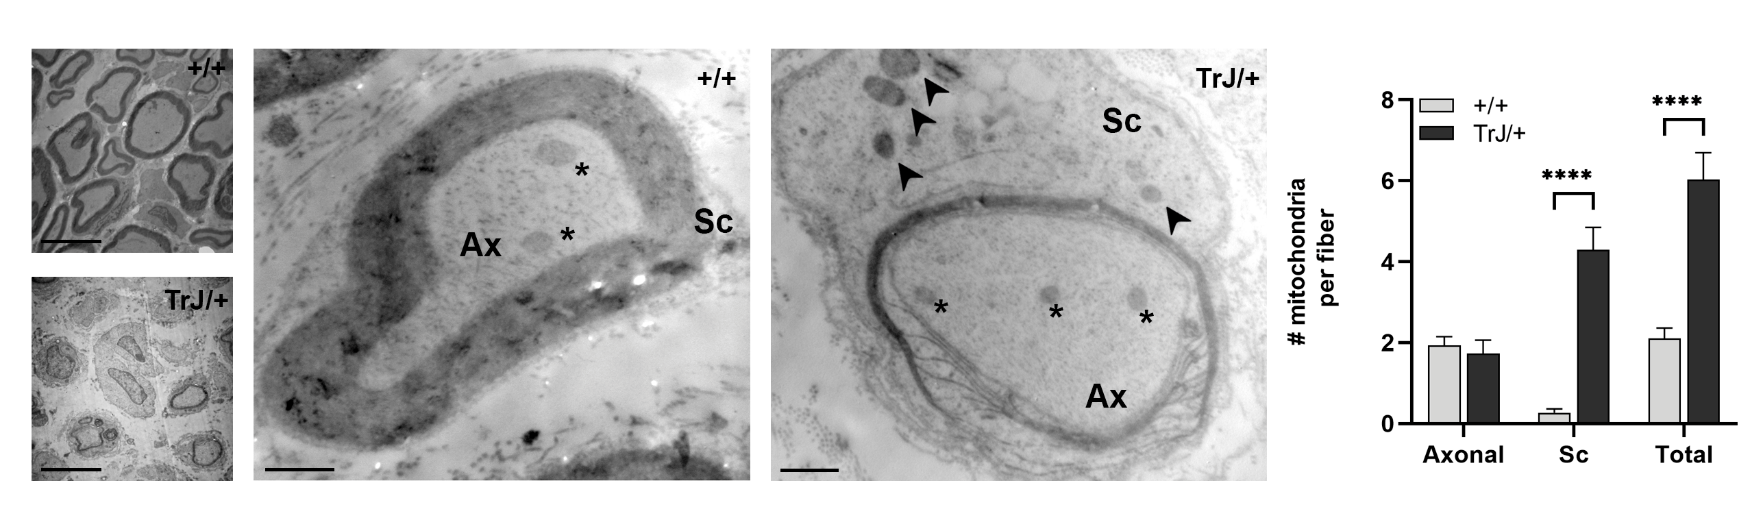
In this supplementary material, we present evidence found by our group regarding mitochondrial differences between Tembler-J (TrJ/+) mice, a murine model of CMT1, and wild-type (+/+) mice. The data presented in this supplementary material were performed from nerves of +/+ and TrJ/+ mice.

**Figure S1.** Mitochondrial distribution in fibers of TrJ/+ and +/+ mice. From electron microscopy images, the number of mitochondria per fiber was quantified, discriminating between the axonal domain (Ax) and the Schwan cell domain (Sc). The count of total mitochondria per fiber allowed us to determine a greater number of this organelle in TrJ/+ fibers. The discrimination of mitochondria according to their domain (arrowhead SC and * Ax) allowed us to understand the differences between TrJ/+ and +/+ is at the SC level since it is the only domain where we found significant differences (Total: U=206.5, p<0,0001; Sc: U= 120.5; p<0.0001). Scale in small images = 3 µm. Scale in large images = 500 nm. **** p<0.0001


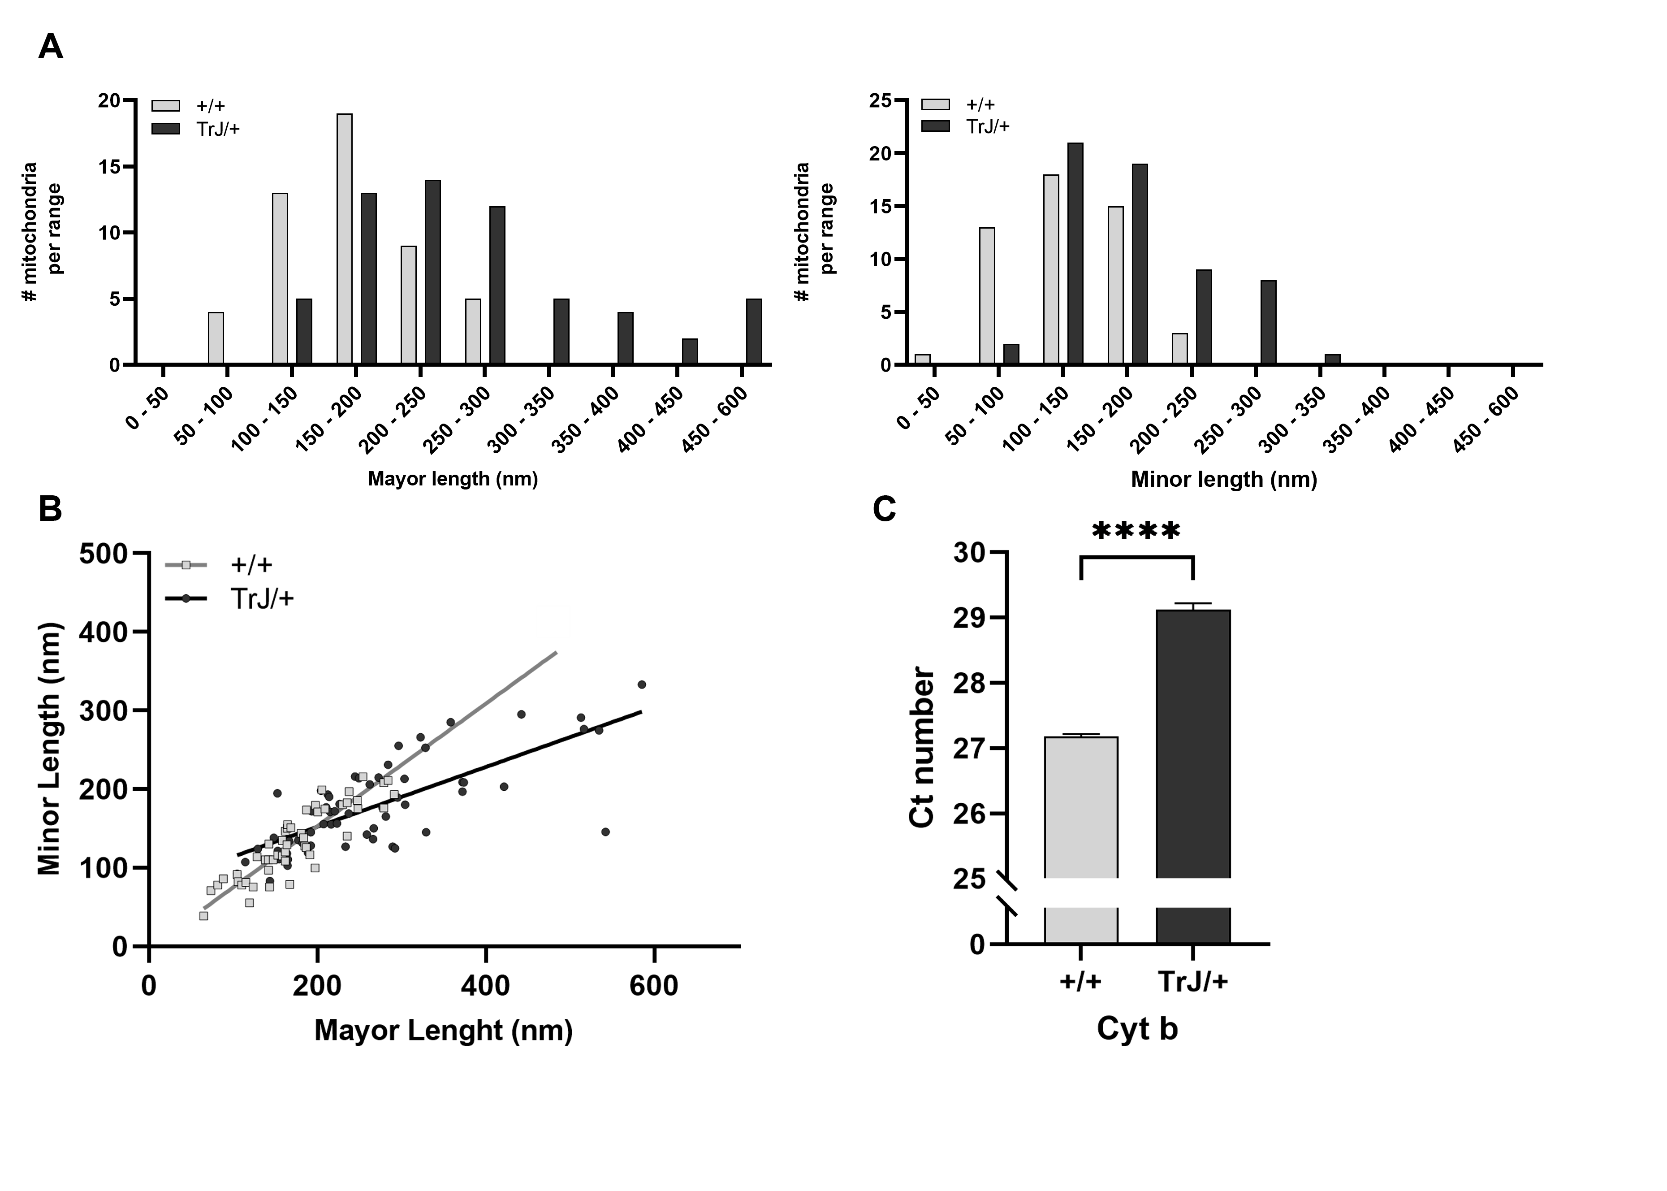
**Figure S2.** Morphology and differential gene expression in mitochondria of SCs from TrJ/+ and +/+ mice. Schwann cell mitochondria were analyzed to understand some of their morphology, cytochrome b transcriptional expression and differences between +/+ and TrJ/+ genotypes. (**A**) The distribution of mitochondrial lengths (major and minor) was evaluated for +/+ and for TrJ/+. Sc TrJ/+ mitochondria present higher values of major diameter, reaching values of 450-600 nm, compared to +/+, where the largest diameter reached by mitochondria is 250-300 nm. We also found differences in the modal value of the distribution; while for +/+ mitochondrial the mode is in the range of 150-200 nm, for TrJ/+ it is 200-250 nm. (**B**) Correlation was found between major and minor lengths of mitochondria in +/+ and TrJ/+ genotypes (p<0.0001). Linear regression of the data was performed, where both genotypes fit a straight line, but with different equations. (**C**) Cytochrome b expression levels showed a significant increase in Ct number in TrJ/+, compared to +/+ (t=18.53, df=8, p<0.0001).
